# Supplementary material for: Which actionable statements qualify as good practice statements In Covid-19 guidelines? A systematic appraisal
Source: HighWire-hosted journal article supplement (doi:10.1136/bmjebm-2021-111866), 2022-04-15
Supplement: bmjebm-2021-111866supp001_data_supplement.pdf [file bmjebm-2021-111866supp001_data_supplement.pdf]

| Process for developing good practice statement                                                                                                                                                                                                                                        | Supporting information                                                                                                                    | Verification                                                                                                                                                                                                                                                                                                                                                                                                                                                                                                                                                                                                                                                                                                                                                                                                                                                                                                                                                          |                               |  |                           |                          |                      |                          |                                                         |                          |                                    |                          |                                       |                          |                    |                          |        |                          |               |                          |             |                          |
|---------------------------------------------------------------------------------------------------------------------------------------------------------------------------------------------------------------------------------------------------------------------------------------|-------------------------------------------------------------------------------------------------------------------------------------------|-----------------------------------------------------------------------------------------------------------------------------------------------------------------------------------------------------------------------------------------------------------------------------------------------------------------------------------------------------------------------------------------------------------------------------------------------------------------------------------------------------------------------------------------------------------------------------------------------------------------------------------------------------------------------------------------------------------------------------------------------------------------------------------------------------------------------------------------------------------------------------------------------------------------------------------------------------------------------|-------------------------------|--|---------------------------|--------------------------|----------------------|--------------------------|---------------------------------------------------------|--------------------------|------------------------------------|--------------------------|---------------------------------------|--------------------------|--------------------|--------------------------|--------|--------------------------|---------------|--------------------------|-------------|--------------------------|
| <i>Write Good Practice Statement</i>                                                                                                                                                                                                                                                  |                                                                                                                                           |                                                                                                                                                                                                                                                                                                                                                                                                                                                                                                                                                                                                                                                                                                                                                                                                                                                                                                                                                                       |                               |  |                           |                          |                      |                          |                                                         |                          |                                    |                          |                                       |                          |                    |                          |        |                          |               |                          |             |                          |
| <i>Does the statement follow a PICO prioritization process?</i>                                                                                                                                                                                                                       |                                                                                                                                           | <input type="radio"/> Yes <input type="radio"/> No                                                                                                                                                                                                                                                                                                                                                                                                                                                                                                                                                                                                                                                                                                                                                                                                                                                                                                                    |                               |  |                           |                          |                      |                          |                                                         |                          |                                    |                          |                                       |                          |                    |                          |        |                          |               |                          |             |                          |
| <b>If you answered No →</b><br>1) Explain why the PICO question was not prioritized but is being addressed → avoid developing any type of actionable statement that acts as an independent response to the PICO question.                                                             |                                                                                                                                           |                                                                                                                                                                                                                                                                                                                                                                                                                                                                                                                                                                                                                                                                                                                                                                                                                                                                                                                                                                       |                               |  |                           |                          |                      |                          |                                                         |                          |                                    |                          |                                       |                          |                    |                          |        |                          |               |                          |             |                          |
| <i>Are the Population and Intervention components clear?</i>                                                                                                                                                                                                                          |                                                                                                                                           | <input type="radio"/> Yes <input type="radio"/> No                                                                                                                                                                                                                                                                                                                                                                                                                                                                                                                                                                                                                                                                                                                                                                                                                                                                                                                    |                               |  |                           |                          |                      |                          |                                                         |                          |                                    |                          |                                       |                          |                    |                          |        |                          |               |                          |             |                          |
| <b>If you answered No →</b><br>Check whether you are developing an implementation consideration (refer to flow chart in Lotfi et al.(8))                                                                                                                                              |                                                                                                                                           |                                                                                                                                                                                                                                                                                                                                                                                                                                                                                                                                                                                                                                                                                                                                                                                                                                                                                                                                                                       |                               |  |                           |                          |                      |                          |                                                         |                          |                                    |                          |                                       |                          |                    |                          |        |                          |               |                          |             |                          |
| Items to complete                                                                                                                                                                                                                                                                     | Supporting information                                                                                                                    | Verification                                                                                                                                                                                                                                                                                                                                                                                                                                                                                                                                                                                                                                                                                                                                                                                                                                                                                                                                                          |                               |  |                           |                          |                      |                          |                                                         |                          |                                    |                          |                                       |                          |                    |                          |        |                          |               |                          |             |                          |
| <b><i>All the following criteria must be fulfilled to consider the statement a GPS.</i></b>                                                                                                                                                                                           |                                                                                                                                           |                                                                                                                                                                                                                                                                                                                                                                                                                                                                                                                                                                                                                                                                                                                                                                                                                                                                                                                                                                       |                               |  |                           |                          |                      |                          |                                                         |                          |                                    |                          |                                       |                          |                    |                          |        |                          |               |                          |             |                          |
| (1) Message is really necessary in regard to actual health care practice                                                                                                                                                                                                              |                                                                                                                                           | This criterion has been addressed:<br><input type="radio"/> Yes <input type="radio"/> No                                                                                                                                                                                                                                                                                                                                                                                                                                                                                                                                                                                                                                                                                                                                                                                                                                                                              |                               |  |                           |                          |                      |                          |                                                         |                          |                                    |                          |                                       |                          |                    |                          |        |                          |               |                          |             |                          |
| (2) Implementing the GPS results in a large net positive consequence (i.e. satisfy several evidence to decision (EtD) criteria) after consideration of all relevant outcomes and potential downstream consequences<br>** check the criteria considered in the development of the GPS. |                                                                                                                                           | This criterion has been addressed:<br><input type="radio"/> Yes <input type="radio"/> No<br><br><table border="1"> <thead> <tr> <th colspan="2">Evidence-to-Decision criteria</th> </tr> </thead> <tbody> <tr> <td>Importance of the problem</td> <td><input type="checkbox"/></td> </tr> <tr> <td>Certainty in effects</td> <td><input type="checkbox"/></td> </tr> <tr> <td>Variability and certainty in the importance of outcomes</td> <td><input type="checkbox"/></td> </tr> <tr> <td>Magnitude of resource requirements</td> <td><input type="checkbox"/></td> </tr> <tr> <td>Certainty of evidence of resource use</td> <td><input type="checkbox"/></td> </tr> <tr> <td>Cost-effectiveness</td> <td><input type="checkbox"/></td> </tr> <tr> <td>Equity</td> <td><input type="checkbox"/></td> </tr> <tr> <td>Acceptability</td> <td><input type="checkbox"/></td> </tr> <tr> <td>Feasibility</td> <td><input type="checkbox"/></td> </tr> </tbody> </table> | Evidence-to-Decision criteria |  | Importance of the problem | <input type="checkbox"/> | Certainty in effects | <input type="checkbox"/> | Variability and certainty in the importance of outcomes | <input type="checkbox"/> | Magnitude of resource requirements | <input type="checkbox"/> | Certainty of evidence of resource use | <input type="checkbox"/> | Cost-effectiveness | <input type="checkbox"/> | Equity | <input type="checkbox"/> | Acceptability | <input type="checkbox"/> | Feasibility | <input type="checkbox"/> |
| Evidence-to-Decision criteria                                                                                                                                                                                                                                                         |                                                                                                                                           |                                                                                                                                                                                                                                                                                                                                                                                                                                                                                                                                                                                                                                                                                                                                                                                                                                                                                                                                                                       |                               |  |                           |                          |                      |                          |                                                         |                          |                                    |                          |                                       |                          |                    |                          |        |                          |               |                          |             |                          |
| Importance of the problem                                                                                                                                                                                                                                                             | <input type="checkbox"/>                                                                                                                  |                                                                                                                                                                                                                                                                                                                                                                                                                                                                                                                                                                                                                                                                                                                                                                                                                                                                                                                                                                       |                               |  |                           |                          |                      |                          |                                                         |                          |                                    |                          |                                       |                          |                    |                          |        |                          |               |                          |             |                          |
| Certainty in effects                                                                                                                                                                                                                                                                  | <input type="checkbox"/>                                                                                                                  |                                                                                                                                                                                                                                                                                                                                                                                                                                                                                                                                                                                                                                                                                                                                                                                                                                                                                                                                                                       |                               |  |                           |                          |                      |                          |                                                         |                          |                                    |                          |                                       |                          |                    |                          |        |                          |               |                          |             |                          |
| Variability and certainty in the importance of outcomes                                                                                                                                                                                                                               | <input type="checkbox"/>                                                                                                                  |                                                                                                                                                                                                                                                                                                                                                                                                                                                                                                                                                                                                                                                                                                                                                                                                                                                                                                                                                                       |                               |  |                           |                          |                      |                          |                                                         |                          |                                    |                          |                                       |                          |                    |                          |        |                          |               |                          |             |                          |
| Magnitude of resource requirements                                                                                                                                                                                                                                                    | <input type="checkbox"/>                                                                                                                  |                                                                                                                                                                                                                                                                                                                                                                                                                                                                                                                                                                                                                                                                                                                                                                                                                                                                                                                                                                       |                               |  |                           |                          |                      |                          |                                                         |                          |                                    |                          |                                       |                          |                    |                          |        |                          |               |                          |             |                          |
| Certainty of evidence of resource use                                                                                                                                                                                                                                                 | <input type="checkbox"/>                                                                                                                  |                                                                                                                                                                                                                                                                                                                                                                                                                                                                                                                                                                                                                                                                                                                                                                                                                                                                                                                                                                       |                               |  |                           |                          |                      |                          |                                                         |                          |                                    |                          |                                       |                          |                    |                          |        |                          |               |                          |             |                          |
| Cost-effectiveness                                                                                                                                                                                                                                                                    | <input type="checkbox"/>                                                                                                                  |                                                                                                                                                                                                                                                                                                                                                                                                                                                                                                                                                                                                                                                                                                                                                                                                                                                                                                                                                                       |                               |  |                           |                          |                      |                          |                                                         |                          |                                    |                          |                                       |                          |                    |                          |        |                          |               |                          |             |                          |
| Equity                                                                                                                                                                                                                                                                                | <input type="checkbox"/>                                                                                                                  |                                                                                                                                                                                                                                                                                                                                                                                                                                                                                                                                                                                                                                                                                                                                                                                                                                                                                                                                                                       |                               |  |                           |                          |                      |                          |                                                         |                          |                                    |                          |                                       |                          |                    |                          |        |                          |               |                          |             |                          |
| Acceptability                                                                                                                                                                                                                                                                         | <input type="checkbox"/>                                                                                                                  |                                                                                                                                                                                                                                                                                                                                                                                                                                                                                                                                                                                                                                                                                                                                                                                                                                                                                                                                                                       |                               |  |                           |                          |                      |                          |                                                         |                          |                                    |                          |                                       |                          |                    |                          |        |                          |               |                          |             |                          |
| Feasibility                                                                                                                                                                                                                                                                           | <input type="checkbox"/>                                                                                                                  |                                                                                                                                                                                                                                                                                                                                                                                                                                                                                                                                                                                                                                                                                                                                                                                                                                                                                                                                                                       |                               |  |                           |                          |                      |                          |                                                         |                          |                                    |                          |                                       |                          |                    |                          |        |                          |               |                          |             |                          |
| (3) Collecting and summarizing the evidence is a poor use of a guideline panel's limited time, energy or resources. The opportunity cost of collecting and summarizing the evidence is large and can be avoided.                                                                      |                                                                                                                                           | This criterion has been addressed:<br><input type="radio"/> Yes <input type="radio"/> No                                                                                                                                                                                                                                                                                                                                                                                                                                                                                                                                                                                                                                                                                                                                                                                                                                                                              |                               |  |                           |                          |                      |                          |                                                         |                          |                                    |                          |                                       |                          |                    |                          |        |                          |               |                          |             |                          |
| (4) There is a well-documented clear and explicit rationale connecting the indirect evidence                                                                                                                                                                                          |                                                                                                                                           | This criterion has been addressed:<br><input type="radio"/> Yes <input type="radio"/> No                                                                                                                                                                                                                                                                                                                                                                                                                                                                                                                                                                                                                                                                                                                                                                                                                                                                              |                               |  |                           |                          |                      |                          |                                                         |                          |                                    |                          |                                       |                          |                    |                          |        |                          |               |                          |             |                          |
| (5) Clear and actionable (This criterion should apply to any developed statement. For example, all formal recommendations are clear and actionable)                                                                                                                                   |                                                                                                                                           | This criterion has been addressed:<br><input type="radio"/> Yes <input type="radio"/> No                                                                                                                                                                                                                                                                                                                                                                                                                                                                                                                                                                                                                                                                                                                                                                                                                                                                              |                               |  |                           |                          |                      |                          |                                                         |                          |                                    |                          |                                       |                          |                    |                          |        |                          |               |                          |             |                          |
| <i>Final judgement</i>                                                                                                                                                                                                                                                                |                                                                                                                                           |                                                                                                                                                                                                                                                                                                                                                                                                                                                                                                                                                                                                                                                                                                                                                                                                                                                                                                                                                                       |                               |  |                           |                          |                      |                          |                                                         |                          |                                    |                          |                                       |                          |                    |                          |        |                          |               |                          |             |                          |
| Did you answer Yes to <b>all</b> of the above?                                                                                                                                                                                                                                        | <input type="radio"/> Yes Development as GPS is appropriate                                                                               |                                                                                                                                                                                                                                                                                                                                                                                                                                                                                                                                                                                                                                                                                                                                                                                                                                                                                                                                                                       |                               |  |                           |                          |                      |                          |                                                         |                          |                                    |                          |                                       |                          |                    |                          |        |                          |               |                          |             |                          |
|                                                                                                                                                                                                                                                                                       | <input type="radio"/> No Development as GPS is <b>not</b> appropriate<br>→ Revisit the PICO question and the importance of addressing it. |                                                                                                                                                                                                                                                                                                                                                                                                                                                                                                                                                                                                                                                                                                                                                                                                                                                                                                                                                                       |                               |  |                           |                          |                      |                          |                                                         |                          |                                    |                          |                                       |                          |                    |                          |        |                          |               |                          |             |                          |
