# Supplementary material for: Which actionable statements qualify as good practice statements In Covid-19 guidelines? A systematic appraisal
Source: HighWire-hosted journal article supplement (doi:10.1136/bmjebm-2021-111866), 2022-04-15
Supplement: bmjebm-2021-111866supp002_data_supplement.pdf [file bmjebm-2021-111866supp002_data_supplement.pdf]

## Supplementary

**Supplementary Table S1: Definitions of guidelines and actionable statements used in the eCOVID-19RecMap “Created by authors”**

| Nomenclature                   | Definition                                                                                                                                                                                                                                                                                                                                                                                                                                                                                                                                                                                                                                                                                                                                                                                                                                                                                  |
|--------------------------------|---------------------------------------------------------------------------------------------------------------------------------------------------------------------------------------------------------------------------------------------------------------------------------------------------------------------------------------------------------------------------------------------------------------------------------------------------------------------------------------------------------------------------------------------------------------------------------------------------------------------------------------------------------------------------------------------------------------------------------------------------------------------------------------------------------------------------------------------------------------------------------------------|
| <b>Clinical guidelines</b>     | <p>“systematically developed statements to assist practitioner and patient decisions about appropriate healthcare for specific clinical circumstances” (24)</p> <p>“Healthcare guidelines are statements that include recommendations intended to optimise healthcare, whether at the clinical, public health or health policy levels. They should be informed by a systematic review of evidence and an assessment of the desirable and undesirable consequences of alternative care options” (25)</p>                                                                                                                                                                                                                                                                                                                                                                                     |
| <b>Formal recommendation</b>   | <p>“A formal recommendation is an actionable statement about the choice between two or more management or policy options (interventions) in a specific population and, if relevant, in a specific setting. Alternative option(s) (i.e. comparator(s)) should be specified in the recommendation if they are not self-evident. These statements are the results of a formal deliberation process, and contain an explicit and direct link to the bodies of evidence resulting from a systematic literature search and appraisal process.”(2)</p> <p><b>Example:</b> “The Canadian Rheumatology Association guideline panel suggests using COVID-19 vaccination over no COVID-19 vaccination in persons with AIRD (conditional recommendation, low certainty of the evidence)”</p> <p><i>From CRA Recommendation on Covid-19 Vaccination in Persons with Autoimmune Rheumatic Disease</i></p> |
| <b>Informal recommendation</b> | <p>“An informal recommendation is an actionable statement about the choice of one or more intervention options in a specific population and, if relevant, in a specific setting. These statements were not issued following a formal deliberative process, do not directly link to the bodies of evidence assembled for the guideline, and do not fulfill the rigorous set of logical rules identifying good practice statements.” (2)</p> <p><b>Example:</b> “In patients with PIMS-TS and thromboembolism or suspected deep vein thrombosis, administer enoxaparin at a dose of 1 mg/kg every 12 h delivered subcutaneously.”</p> <p><i>From Maintaining a safe and adequate blood supply and collecting convalescent plasma in the context of the COVID-19 pandemic: interim guidance, 17 February 2021</i></p>                                                                          |
| <b>Good Practice Statement</b> | <p>“Good practice statements are necessary actionable and clear guideline statements. They describe the population and intervention options and, if appropriate, comparator components of the recommendation.” (2)</p> <p><b>Example:</b> “For personnel working with untreated sewage for which there are considerable infectious risks, standard PPE should be worn (protective outerwear, heavy-duty gloves, boots, masks, goggles or a face shield).”</p>                                                                                                                                                                                                                                                                                                                                                                                                                               |

|  |                                                                                                                                             |
|--|---------------------------------------------------------------------------------------------------------------------------------------------|
|  | From <i>Water, sanitation, hygiene, and waste management for SARS-CoV-2, the virus that causes COVID-19: interim guidance, 29 July 2020</i> |
|--|---------------------------------------------------------------------------------------------------------------------------------------------|

GRADEpro GDT Covid19 Extraction - Form

Should [intervention] vs [comparison] be used for [health problem and/or population?]

Bottom panel Explanations

Good practice statement

Clear and actionable

The message is necessary in regard to actual health care practice

After consideration of all relevant outcomes and potential downstream consequences, implementing the good practice statement results in a large net positive consequences

Collecting and summarizing the evidence is a poor use of the guideline panel's limited time and energy (opportunity cost is large)

There is a well-documented clear and explicit rationale connecting the indirect evidence

Add recommendation number

No  
Probably yes  
Probably no  
No

**Supplementary Figure S1. Template of Good Practice Statement extraction form. “Created by authors”**

**Supplementary Table S1. Eligible COVID-19 guidelines “Created by authors”**

| Guideline name                                                                                                                                                                                               | Source                                                                                 | Include good practice statements |
|--------------------------------------------------------------------------------------------------------------------------------------------------------------------------------------------------------------|----------------------------------------------------------------------------------------|----------------------------------|
| 1563 - Guidance on developing a national deployment and vaccination plan for COVID-19 vaccines: interim guidance                                                                                             | World Health Organization (WHO); United Nations International Children's Fund (UNICEF) | Yes                              |
| A Regional Canadian Expert Consensus on recommendations for restoring exercise and pulmonary function testing in low and moderate-high community COVID-19 prevalence settings                                | Regional Canadian Expert Consensus                                                     | Yes                              |
| Acceptance and demand for COVID-19 vaccines: Interim guidance, 31 January 2021                                                                                                                               | World Health Organization (WHO)                                                        | No                               |
| Actions for consideration in the care and protection of vulnerable population groups for COVID-19                                                                                                            | World Health Organization (WHO)                                                        | No                               |
| Addressing noncommunicable diseases in the COVID-19 response                                                                                                                                                 | World Health Organization (WHO)                                                        | Yes                              |
| Advice on the use of point-of-care immunodiagnostic tests for COVID-19: scientific brief, 8 April 2020                                                                                                       | World Health Organization (WHO)                                                        | No                               |
| Algorithm for COVID-19 triage and referral : patient triage and referral for resource-limited settings during community transmission                                                                         | World Health Organization (WHO)                                                        | Yes                              |
| Algorithms for testing COVID-19 focused on use of RT-PCR and high-affinity serological testing: a consensus statement from a panel of Latin American experts                                                 | International Journal of Infectious Diseases                                           | No                               |
| American College of Rheumatology Clinical Guidance for Pediatric Patients with Multisystem Inflammatory Syndrome in Children (MIS-C) Associated with SARS-CoV-2 and Hyperinflammation in COVID-19. Version 2 | American College of Rheumatology                                                       | No                               |
| Analysing and using routine data to monitor the effects of COVID-19 on essential health services: practical guide for national and subnational decision-makers                                               | World Health Organization (WHO)                                                        | Yes                              |
| Antigen-detection in the diagnosis of SARS-CoV-2 infection using rapid immunoassays                                                                                                                          | World Health Organization (WHO)                                                        | No                               |
| At home: Using ventilation and filtration to reduce the risk of aerosol transmission of COVID-19                                                                                                             | Public Health Agency of Canada (PHAC)                                                  | Yes                              |

|                                                                                                                                                                             |                                                          |     |
|-----------------------------------------------------------------------------------------------------------------------------------------------------------------------------|----------------------------------------------------------|-----|
| Australian guidelines for the clinical care of people with COVID-19 (version 37.1) ***See source document link for most recent version (coming to covid.gradepro.org soon!) | Australian National COVID-19 Clinical Evidence Taskforce | No  |
| Bacille Calmette-Guérin (BCG) vaccination and COVID-19                                                                                                                      | World Health Organization (WHO)                          | No  |
| Calibrating long-term non-pharmaceutical interventions for COVID-19 : principles and facilitation tools                                                                     | World Health Organization (WHO)                          | Yes |
| Canadian Rheumatology Association Position Statement on COVID-19 Vaccination                                                                                                | Canadian Rheumatology Association (CRA)                  | No  |
| Cardio-Oncology care in the era of the coronavirus disease 2019 (COVID-19) pandemic: An International Cardio-Oncology Society (ICOS) statement                              | International Cardio-Oncology Society (ICOS)             | Yes |
| Care for Breastfeeding Women. Interim guidance on breastfeeding and breast milk feeds in the context of COVID-19                                                            | Centers for Disease Control and Prevention (CDC)         | Yes |
| Cleaning and Disinfecting Your Facility - Every Day and When Someone is Sick                                                                                                | Centers for Disease Control and Prevention (CDC)         | Yes |
| Cleaning and disinfection of environmental surfaces in the context of COVID-19                                                                                              | World Health Organization (WHO)                          | Yes |
| Cleaning, disinfection and hand hygiene in schools, A Toolkit for School Administrators.                                                                                    | Centers for Disease Control and Prevention (CDC)         | Yes |
| Clinical management of severe acute respiratory infection (SARI), when COVID-19 disease is suspected: interim guidance, 13 March 2020                                       | World Health Organization (WHO)                          | Yes |
| Community-based health care, including outreach and campaigns, in the context of the COVID-19 pandemic                                                                      | World Health Organization (WHO)                          | No  |
| Conducting community engagement for COVID-19 vaccines: interim guidance, 31 January 2021                                                                                    | World Health Organization (WHO)                          | Yes |
| Considerations for Case Investigation and Contact Tracing in K-12 Schools and Institutions of Higher Education (IHEs)                                                       | Centers for Disease Control and Prevention (CDC)         | Yes |
| Considerations for forming a regional COVID-19 review committee (RRC), technical brief, 29 January 2021                                                                     | World Health Organization (WHO)                          | Yes |
| Considerations for implementing a risk-based approach to international travel in the context                                                                                | World Health Organization (WHO)                          | Yes |

|                                                                                                                                                                                    |                                                           |     |
|------------------------------------------------------------------------------------------------------------------------------------------------------------------------------------|-----------------------------------------------------------|-----|
| of COVID-19: interim guidance, 16 December 2020                                                                                                                                    |                                                           |     |
| Considerations for implementing and adjusting public health and social measures in the context of COVID-19: interim guidance, 4 November 2020                                      | World Health Organization (WHO)                           | Yes |
| Considerations for implementing mass treatment, active case-finding and population-based surveys for neglected tropical diseases in the context of the COVID-19 pandemic           | World Health Organization (WHO)                           | Yes |
| Considerations for Inpatient Obstetric Healthcare Settings                                                                                                                         | Centers for Disease Control and Prevention (CDC)          | Yes |
| Considerations for Institutions of Higher Education                                                                                                                                | Centers for Disease Control and Prevention (CDC)          | Yes |
| Considerations for quarantine of contacts of COVID-19 cases: interim guidance                                                                                                      | World Health Organization (WHO)                           | Yes |
| Considerations for school-related public health measures in the context of COVID-19                                                                                                | World Health Organization (WHO)                           | Yes |
| Considerations in the investigation of cases and clusters of COVID-19: interim guidance, 22 October 2020                                                                           | World Health Organization (WHO)                           | Yes |
| Considerations to relax border restrictions in the Western Pacific Region                                                                                                          | World Health Organization (WHO)                           | Yes |
| Contact tracing in the context of COVID-19: interim guidance, 1 February 2021                                                                                                      | World Health Organization (WHO)                           | Yes |
| Contact tracing: public health management of persons, including healthcare workers, who have had contact with COVID-19 cases in the European Union third update                    | European Centre for Disease Prevention and Control (ECDC) | Yes |
| Continuing essential sexual reproductive, maternal, neonatal, child and adolescent health services during COVID-19 pandemic: practical considerations                              | World Health Organization (WHO)                           | Yes |
| Controlling the spread of COVID-19 at ground crossings                                                                                                                             | World Health Organization (WHO)                           | Yes |
| Coronavirus disease 2019 (COVID-19) and supply of substances of human origin in the EU/EEA - second update                                                                         | European Centre for Disease Prevention and Control (ECDC) | Yes |
| Coronavirus Disease 2019 (COVID-19) Treatment Guidelines (January 21, 2021 version) ***Most recent version coming soon to covid.gradepro.org; in meantime see source document URL) | National Institutes of Health (NIH)                       | Yes |

|                                                                                                                                       |                                                                                                                                                    |     |
|---------------------------------------------------------------------------------------------------------------------------------------|----------------------------------------------------------------------------------------------------------------------------------------------------|-----|
| COVID-19 and food safety: guidance for food businesses: interim guidance, 07 April 2020                                               | World Health Organization (WHO)                                                                                                                    | Yes |
| COVID-19 and mandatory vaccination: ethical considerations and caveats: policy brief, 13 April 2021                                   | World Health Organization (WHO)                                                                                                                    | No  |
| COVID-19 and schools: Guidelines of the French Pediatric Society                                                                      | French Pediatric Society                                                                                                                           | Yes |
| COVID-19 and Thrombotic or Thromboembolic Disease: Implications for Prevention, Antithrombotic Therapy, and Follow-Up                 | Journal of the American College of Cardiology                                                                                                      | No  |
| COVID-19 Clinical Management                                                                                                          | World Health Organization (WHO)                                                                                                                    | Yes |
| COVID-19 Critical Infrastructure Sector Response Planning                                                                             | Centers for Disease Control and Prevention (CDC)                                                                                                   | Yes |
| COVID-19 global risk communication and community engagement strategy                                                                  | World Health Organization (WHO)                                                                                                                    | Yes |
| COVID-19 guidance for schools Kindergarten to Grade 12                                                                                | Public Health Agency of Canada (PHAC)                                                                                                              | Yes |
| COVID-19 impact on perinatal care: risk factors, clinical manifestation and prophylaxis. Polish experts,Äö opinion for December 2020  |                                                                                                                                                    | Yes |
| COVID-19 management in hotels and other entities of the accommodation sector: interim guidance, 25 August 2020                        | World Health Organization (WHO)                                                                                                                    | No  |
| COVID-19 Overview and Infection Prevention and Control Priorities in non-US Healthcare Settings                                       | Centers for Disease Control and Prevention (CDC)                                                                                                   | Yes |
| COVID-19 position statement: Presentations and management of COVID-19 in older people in acute care                                   | Scottish Intercollegiate Guidelines Network (SIGN)                                                                                                 | Yes |
| COVID-19 position statement: the prevention and management of thromboembolism in hospitalised patients with COVID-19-related disease. |                                                                                                                                                    | Yes |
| COVID-19 Rail Protocol: Recommendations for safe resumption of railway services in Europe                                             | European Union Agency,Äös for Railways (ERA);European Commission;European Centre for Disease Prevention and Control (ECDC)                         | Yes |
| COVID-19 rapid guideline: gastrointestinal and liver conditions treated with drugs affecting the immune response                      | National Institute for Health and Care Excellence (NICE)                                                                                           | No  |
| COVID-19 rapid guideline: interstitial lung disease ***update coming soon!***                                                         | National Institute for Health and Care Excellence (NICE)                                                                                           | Yes |
| COVID-19 rapid guideline: Managing the long-term effects of COVID-19                                                                  | National Institute for Health and Care Excellence (NICE);Scottish Intercollegiate Guidelines Network (SIGN);Royal College of General Practitioners | Yes |

|                                                                                                                                                                                                                                               |                                                                                                  |     |
|-----------------------------------------------------------------------------------------------------------------------------------------------------------------------------------------------------------------------------------------------|--------------------------------------------------------------------------------------------------|-----|
| COVID-19 Response Plan for the safe and sustainable reopening of Post Primary Schools                                                                                                                                                         | Department of Education, Government of Ireland                                                   | Yes |
| COVID-19 strategic preparedness and response plan: operational planning guideline: 1 February 2021 to 31 January 2022                                                                                                                         | World Health Organization (WHO)                                                                  | No  |
| COVID-19 support mission to Turkmenistan, 6, 16 July 2020                                                                                                                                                                                     | World Health Organization (WHO)                                                                  | Yes |
| COVID-19 technical mission of experts to Tajikistan: 1, 11 May 2020                                                                                                                                                                           | World Health Organization (WHO)                                                                  | No  |
| COVID-19 vaccination: supply and logistics guidance: interim guidance, 12 February 2021                                                                                                                                                       | World Health Organization (WHO); United Nations International Children's Emergency Fund (UNICEF) | Yes |
| COVID-19 vaccines: safety surveillance manual                                                                                                                                                                                                 | World Health Organization (WHO)                                                                  | Yes |
| COVID-19 Variant of Concern: Case, Contact and Outbreak Management Interim Guidance (version 2.0)                                                                                                                                             | Ontario Ministry of Health and Long-Term Care                                                    | Yes |
| COVID-19: an informative guide: advice for journalists                                                                                                                                                                                        | World Health Organization (WHO)                                                                  | Yes |
| COVID-19: Guidance on indoor ventilation during the pandemic                                                                                                                                                                                  | Public Health Agency of Canada (PHAC)                                                            | Yes |
| COVID-19: occupational health and safety for health workers: interim guidance, 2 February 2021                                                                                                                                                | World Health Organization (WHO)                                                                  | Yes |
| COVID-19 strategy update (as of 14 April 2020), Mise à jour de la stratégie COVID-19 (au 14 avril 2020)                                                                                                                                       | World Health Organization (WHO)                                                                  | Yes |
| CRA Recommendation on Covid-19 Vaccination in Persons with Autoimmune Rheumatic Disease                                                                                                                                                       | Canadian Rheumatology Association (CRA)                                                          | No  |
| Critical preparedness, readiness and response actions for COVID-19: interim guidance, 27 May 2021                                                                                                                                             | World Health Organization (WHO)                                                                  | Yes |
| Current Recommendations for the Management of Stroke Patients in the Middle East in the Era of COVID-19 Pandemic; Statement from the MENA SINO                                                                                                | Middle East and North Africa Stroke and Interventional Neurotherapies Organization (MENA-SINO)   | Yes |
| Data for action: achieving high uptake of COVID-19 vaccines: gathering and using data on the behavioural and social drivers of vaccination: a guidebook for immunization programmes and implementing partners: interim guidance, 1 April 2021 | World Health Organization (WHO)                                                                  | Yes |



|                                                                                                                                                                                                                                                                                                           |                                                                                                  |     |
|-----------------------------------------------------------------------------------------------------------------------------------------------------------------------------------------------------------------------------------------------------------------------------------------------------------|--------------------------------------------------------------------------------------------------|-----|
| Detection of new SARS-CoV-2 variants related to mink                                                                                                                                                                                                                                                      | European Centre for Disease Prevention and Control (ECDC)                                        | Yes |
| Diagnostic testing for SARS-CoV-2: interim guidance, 11 September 2020                                                                                                                                                                                                                                    | World Health Organization (WHO)                                                                  | Yes |
| Disability considerations for COVID-19 vaccination: WHO and UNICEF policy brief, 19 April 2021                                                                                                                                                                                                            | World Health Organization (WHO); United Nations International Children's Emergency Fund (UNICEF) | Yes |
| Disaster evacuation shelters in the context of COVID-19                                                                                                                                                                                                                                                   | World Health Organization (WHO)                                                                  | Yes |
| EAACI statement on the diagnosis, management and prevention of severe allergic reactions to COVID-19 vaccines                                                                                                                                                                                             | European Academy of Allergy and Clinical Immunology (EAACI)                                      | No  |
| Effectiveness of different forms of oxygen therapy for COVID-19 management                                                                                                                                                                                                                                | World Health Organization (WHO)                                                                  | Yes |
| Establishing integrated nationwide contact tracing systems                                                                                                                                                                                                                                                | World Health Organization (WHO)                                                                  | Yes |
| Estimating COVID-19 vaccine effectiveness against severe acute respiratory infections (SARI) hospitalisations associated with laboratory-confirmed SARS-CoV-2: an evaluation using the test-negative design: guidance document                                                                            | World Health Organization (WHO)                                                                  | Yes |
| EULAR points to consider on pathophysiology and use of immunomodulatory therapies in COVID-19                                                                                                                                                                                                             | European League Against Rheumatism (EULAR)                                                       | No  |
| European Technical Advisory Group of Experts on Immunization (ETAGE) interim recommendations, June 2021 Inclusion of adolescents aged 12-15 years in national COVID-19 vaccination programmes                                                                                                             | World Health Organization                                                                        | Yes |
| Evaluating COVID-19 disease transmission and public health measures in schools: Outbreak investigation guidance                                                                                                                                                                                           | Public Health Agency of Canada (PHAC)                                                            | Yes |
| Evaluation of COVID-19 vaccine effectiveness: interim guidance, 17 March 2021                                                                                                                                                                                                                             | World Health Organization (WHO)                                                                  | No  |
| Evidence review - Public health measures in the aviation sector in the context of COVID-19: quarantine and isolation (21 May 2021), Examen des données factuelles - Mesures de santé publique dans le secteur du transport aérien dans le contexte de la COVID-19: quarantaine et isolement (21 mai 2021) | World Health Organization (WHO)                                                                  | No  |

|                                                                                                                                                                         |                                                                                                                                                                                                                                 |     |
|-------------------------------------------------------------------------------------------------------------------------------------------------------------------------|---------------------------------------------------------------------------------------------------------------------------------------------------------------------------------------------------------------------------------|-----|
| Exploration of COVID-19 health-care worker cases : implications for action                                                                                              | World Health Organization (WHO)                                                                                                                                                                                                 | Yes |
| Fabry disease and COVID-19: international expert recommendations for management based on real-world experience                                                          | Clinical Kidney Journal                                                                                                                                                                                                         | Yes |
| Federal safety guidance to protect drivers and limit the spread of COVID-19 in commercial vehicle operations                                                            | Public Health Agency of Canada (PHAC)                                                                                                                                                                                           | Yes |
| For immunization providers: Interim national vaccine storage, handling and transportation guidelines for ultra-low temperature and frozen temperature COVID-19 vaccines | Public Health Agency of Canada (PHAC)                                                                                                                                                                                           | Yes |
| Framework for decision-making: implementation of mass vaccination campaigns in the context of COVID-19                                                                  | World Health Organization (WHO)                                                                                                                                                                                                 | Yes |
| Framework for reopening schools                                                                                                                                         | United Nations Educational, Scientific and Cultural Organization (UNESCO);United Nations International Children's Emergency Fund (UNICEF);World Bank;World Food Programme;United Nations High Commissioner for Refugees (UNHCR) | Yes |
| Guidance and Tips for Tribal Community Living During COVID-19                                                                                                           | Centers for Disease Control and Prevention (CDC)                                                                                                                                                                                | Yes |
| Guidance for contacts of people with confirmed coronavirus (COVID-19) infection who do not live with the person                                                         | Public Health England                                                                                                                                                                                                           | Yes |
| Guidance for Institutions of Higher Education with Students Participating in International Travel or Study Abroad Programs                                              | Centers for Disease Control and Prevention (CDC)                                                                                                                                                                                | Yes |
| Guidance for K-12 School Administrators on the Use of Masks in Schools                                                                                                  | Centers for Disease Control and Prevention (CDC)                                                                                                                                                                                | No  |
| Guidance for laboratories shipping specimens to WHO reference laboratories that provide confirmatory testing for COVID-19 virus: interim guidance, 31 March 2020        | World Health Organization (WHO)                                                                                                                                                                                                 | No  |
| Guidance for Pharmacies. Guidance for Pharmacists and Pharmacy Technicians in Community Pharmacies during the COVID-19 Response                                         | Centers for Disease Control and Prevention (CDC)                                                                                                                                                                                | Yes |
| Guidance for post-secondary institutions during the COVID-19 pandemic.                                                                                                  | Public Health Agency of Canada (PHAC)                                                                                                                                                                                           | Yes |

|                                                                                                                                                                               |                                                                                                                                          |     |
|-------------------------------------------------------------------------------------------------------------------------------------------------------------------------------|------------------------------------------------------------------------------------------------------------------------------------------|-----|
| Guidance for providers of services for people experiencing homelessness (in the context of COVID-19)                                                                          | Public Health Agency of Canada (PHAC)                                                                                                    | Yes |
| Guidance for Surveillance of SARS-CoV-2 Variants: Interim Guidance, 9 August 2021                                                                                             | World Health Organization                                                                                                                | Yes |
| Guidance on COVID-19 for the care of older people and people living in long-term care facilities, other non-acute care facilities and home care                               | World Health Organization (WHO)                                                                                                          | Yes |
| Guidance on the prioritization of initial doses of COVID-19 vaccine(s)                                                                                                        | Public Health Agency of Canada (PHAC)                                                                                                    | No  |
| Guidance on the prioritization of key populations for COVID-19 immunization                                                                                                   | Public Health Agency of Canada (PHAC)                                                                                                    | No  |
| Guidance on the use of influenza vaccine in the presence of COVID-19                                                                                                          | Public Health Agency of Canada (PHAC)                                                                                                    | Yes |
| Guidance on utilization of COVID-19 vaccines before the date of expiry, 19 July 2021                                                                                          | World Health Organization (WHO)                                                                                                          | Yes |
| Guidelines for COVID-19 management in hematopoietic cell transplant and cellular therapy patients                                                                             | American Society for Transplantation and Cellular Therapy                                                                                | Yes |
| Guidelines for COVID-19 testing and quarantine of air travellers                                                                                                              | European Centre for Disease Prevention and Control (ECDC)                                                                                | Yes |
| Guidelines for the implementation of non-pharmaceutical interventions against COVID-19                                                                                        | European Centre for Disease Prevention and Control (ECDC)                                                                                | Yes |
| Guidelines for the pharmacological treatment of COVID-19                                                                                                                      | Brazilian Association of Intensive Care Medicine;Brazilian Society of Infectious Diseases;Brazilian Society of Pulmonology and Tisiology | No  |
| Guiding principles for immunization activities during the COVID-19 pandemic: interim guidance, 26 March 2020                                                                  | World Health Organization (WHO)                                                                                                          | Yes |
| Health workers in focus: policies and practices for successful public response to COVID-19 vaccination: strategic considerations for member states in the WHO European region | World Health Organization (WHO)                                                                                                          | Yes |
| Home care for patients with suspected or confirmed COVID-19 and management of their contacts: interim guidance, 12 August 2020                                                | World Health Organization (WHO)                                                                                                          | Yes |
| How to Mitigate COVID-19 transmission in densely populated areas globally                                                                                                     | Centers for Disease Control and Prevention (CDC)                                                                                         | Yes |
| Immunization and Vaccine-related Implementation Research Advisory Committee                                                                                                   | World Health Organization (WHO)                                                                                                          | Yes |

|                                                                                                                                                           |                                                                                                                                                                                                                                                                                                                                                                                                                   |     |
|-----------------------------------------------------------------------------------------------------------------------------------------------------------|-------------------------------------------------------------------------------------------------------------------------------------------------------------------------------------------------------------------------------------------------------------------------------------------------------------------------------------------------------------------------------------------------------------------|-----|
| (,ÄÉVIR-AC),Äé ,Äí Comitv© consultatif sur la vaccination et la recherche sur la mise en œuvre des vaccins (,ÄÉVIR-AC),Äé                                 |                                                                                                                                                                                                                                                                                                                                                                                                                   |     |
| Implementing telemedicine services during COVID-19 : guiding principles and considerations for a stepwise approach                                        | World Health Organization (WHO)                                                                                                                                                                                                                                                                                                                                                                                   | Yes |
| Indian Academy of Pediatrics Guidelines on School Reopening, Remote Learning and Curriculum in and After the COVID-19 Pandemic                            | Indian Academy of Pediatrics (IAP)                                                                                                                                                                                                                                                                                                                                                                                | Yes |
| Indicators to monitor health-care capacity and utilization for decision-making on COVID-19                                                                | World Health Organization (WHO)                                                                                                                                                                                                                                                                                                                                                                                   | Yes |
| Infection prevention and control (IPC) principles and procedures for COVID-19 vaccination activities                                                      | World Health Organization (WHO)                                                                                                                                                                                                                                                                                                                                                                                   | Yes |
| Infection prevention and control during health care when coronavirus disease (,ÄÉCOVID-19),Äé is suspected or confirmed                                   | World Health Organization (WHO)                                                                                                                                                                                                                                                                                                                                                                                   | Yes |
| Infection prevention and control for the safe management of a dead body in the context of COVID-19: interim guidance, 4 September 2020                    | World Health Organization (WHO)                                                                                                                                                                                                                                                                                                                                                                                   | Yes |
| Infection prevention and control guidance for long-term care facilities in the context of COVID-19: interim guidance, 8 January 2021                      | World Health Organization (WHO)                                                                                                                                                                                                                                                                                                                                                                                   | Yes |
| Infection prevention and control in the household management of people with suspected or confirmed coronavirus disease (COVID-19)                         | European Centre for Disease Prevention and Control (ECDC)                                                                                                                                                                                                                                                                                                                                                         | Yes |
| Infection prevention guidelines and considerations for paediatric risk groups when reopening primary schools during COVID-19 pandemic, Norway, April 2020 | Norwegian Institute of Public Health;European Public Health Microbiology Training Programme (EUPHEM);European Centre for Disease Prevention and Control (ECDC);Norwegian Directorate for Education and Training;Paediatric Research Group, Faculty of Health Sciences, University of TromsvT]-Arctic University of Norway;Department of Paediatrics and Adolescence Medicine, University Hospital of North Norway | Yes |
| Infection with SARS-CoV-2 in pregnancy. Update of Information and proposed care. CNGOF                                                                    | French National College of French Obstetrician Gynaecologists                                                                                                                                                                                                                                                                                                                                                     | No  |

|                                                                                                                                                                                                                                       |                                                                                                                                                                           |     |
|---------------------------------------------------------------------------------------------------------------------------------------------------------------------------------------------------------------------------------------|---------------------------------------------------------------------------------------------------------------------------------------------------------------------------|-----|
| Infectious Diseases Society of America Guidelines on the Treatment and Management of Patients with COVID-19                                                                                                                           | Infectious Diseases Society of America (IDSA)                                                                                                                             | No  |
| Information note on HIV and COVID-19                                                                                                                                                                                                  | World Health Organization (WHO)                                                                                                                                           | Yes |
| Interim Clinical Commissioning Policy: Tocilizumab for critically ill patients with COVID-19 pneumonia (adults)                                                                                                                       | National Health Service (NHS)                                                                                                                                             | No  |
| Interim Clinical Considerations for Use of COVID-19 Vaccines Currently Authorized in the United States                                                                                                                                | Centers for Disease Control and Prevention (CDC)                                                                                                                          | Yes |
| Interim Considerations for Testing for K-12 School Administrators and Public Health Officials                                                                                                                                         | Centers for Disease Control and Prevention (CDC)                                                                                                                          | Yes |
| Interim Guidance for Businesses and Employers Responding to Coronavirus Disease 2019 (COVID-19)                                                                                                                                       | Centers for Disease Control and Prevention (CDC)                                                                                                                          | Yes |
| Interim Guidance for COVID-19 Prevention and Control in Schools                                                                                                                                                                       | United Nations International Children's Emergency Fund (UNICEF); World Health Organization (WHO); International Federation of Red Cross and Red Crescent Societies (IFRC) | Yes |
| Interim guidance note for hospitals : managing hospital services, maintaining essential routine health care and generating surge capacity                                                                                             | World Health Organization (WHO)                                                                                                                                           | No  |
| Interim Guidance: Get Your Mass Gatherings or Large Community Events Ready for Coronavirus Disease 2019 (COVID-19)                                                                                                                    | Centers for Disease Control and Prevention (CDC)                                                                                                                          | Yes |
| Interim Infection Prevention and Control Recommendations for Healthcare Personnel During the Coronavirus Disease 2019 (COVID-19) Pandemic                                                                                             | Centers for Disease Control and Prevention (CDC)                                                                                                                          | Yes |
| Interim Public Health Recommendations for Fully Vaccinated People                                                                                                                                                                     | Centers for Disease Control and Prevention (CDC)                                                                                                                          | Yes |
| Interim recommendations for the use of the Janssen Ad26.COV2.S (COVID-19) vaccine: interim guidance, 17 March 2021                                                                                                                    | World Health Organization (WHO)                                                                                                                                           | Yes |
| Interim recommendations for use of the ChAdOx1-S [recombinant] vaccine against COVID-19 (AstraZeneca COVID-19 vaccine AZD1222, SII Covishield, SK Bioscience): interim guidance, first issued 10 February 2021, updated 21 April 2021 | World Health Organization (WHO)                                                                                                                                           | Yes |
| Interim recommendations for use of the inactivated COVID-19 vaccine BIBP developed                                                                                                                                                    | World Health Organization (WHO)                                                                                                                                           | No  |

|                                                                                                                                                                                                                                 |                                                                                                        |     |
|---------------------------------------------------------------------------------------------------------------------------------------------------------------------------------------------------------------------------------|--------------------------------------------------------------------------------------------------------|-----|
| by China National Biotec Group (CNBG), Sinopharm: interim guidance, 7 May 2021                                                                                                                                                  |                                                                                                        |     |
| Interim recommendations for use of the inactivated COVID-19 vaccine, CoronaVac, developed by Sinovac: interim guidance, 24 May 2021                                                                                             | World Health Organization (WHO)                                                                        | Yes |
| Interim recommendations for use of the Moderna mRNA-1273 vaccine against COVID-19: interim guidance                                                                                                                             | World Health Organization (WHO)                                                                        | Yes |
| Interim recommendations for use of the Pfizer, Æ BioNTech COVID-19 vaccine, BNT162b2, under Emergency Use Listing                                                                                                               | World Health Organization (WHO)                                                                        | Yes |
| ISTH interim guidance on recognition and management of coagulopathy in COVID-19                                                                                                                                                 | International Society on Thrombosis and Haemostasis (ISTH)                                             | No  |
| Key considerations for mass gatherings in the context of the COVID-19 outbreak in the Western Pacific Region                                                                                                                    | World Health Organization (WHO)                                                                        | Yes |
| Laboratory biosafety guidance related to coronavirus disease (, Æ COVID-19), Æ: interim guidance, 28 January 2021                                                                                                               | World Health Organization (WHO)                                                                        | Yes |
| Laboratory testing strategy recommendations for COVID-19: interim guidance, 21 March 2020                                                                                                                                       | World Health Organization (WHO)                                                                        | Yes |
| Maintaining a safe and adequate blood supply and collecting convalescent plasma in the context of the COVID-19 pandemic: interim guidance, 17 February 2021                                                                     | World Health Organization (WHO)                                                                        | Yes |
| Maintaining surveillance of influenza and monitoring SARS-CoV-2: adapting Global Influenza Surveillance and Response System (, Æ GISRS), Æ and sentinel systems during the COVID-19 pandemic: interim guidance, 8 November 2020 | World Health Organization (WHO)                                                                        | Yes |
| Management of COVID, Æ associated coagulopathy in persons with haemophilia                                                                                                                                                      | Coagulation Products Safety, Supply and Access (CPSSA) Committee of the World Federation of Hemophilia | No  |
| Management of ill travellers at Points of Entry (international airports, seaports, and ground crossings) in the context of COVID-19                                                                                             | World Health Organization (WHO)                                                                        | Yes |
| Management of severe / critical cases of COVID-19 with non-invasive or mechanical                                                                                                                                               | World Health Organization (WHO)                                                                        | Yes |

|                                                                                                                                                 |                                                                                                  |     |
|-------------------------------------------------------------------------------------------------------------------------------------------------|--------------------------------------------------------------------------------------------------|-----|
| ventilation: based on information as at 1st June 2020                                                                                           |                                                                                                  |     |
| Managing haematology and oncology patients during the COVID-19 pandemic: interim consensus guidance                                             | Australasian Leukaemia and Lymphoma Group; National Centre for Infections in Cancer              | Yes |
| Mask use in the context of COVID-19                                                                                                             | World Health Organization (WHO)                                                                  | No  |
| Media toolkit to prevent and address stigma associated with the migrant population in Malaysia in response to COVID-19                          | World Health Organization (WHO)                                                                  | Yes |
| Mental health and psychosocial support aspects of the COVID-19 response                                                                         | World Health Organization (WHO)                                                                  | No  |
| Methods for the detection and identification of SARS-CoV-2 variants, March 2021                                                                 | World Health Organization (WHO)                                                                  | Yes |
| Mitigating the Impact of Coronavirus Disease (COVID-19) Vaccinations on Patients Undergoing Breast Imaging Examinations                         | American Journal of Roentgenology (AJR)                                                          | Yes |
| Mitigating the impact of COVID-19 on control of vaccine-preventable diseases: a health risk management approach focused on catch-up vaccination | World Health Organization (WHO)                                                                  | Yes |
| Monitoring COVID-19 vaccination: Considerations for the collection and use of vaccination data                                                  | World Health Organization (WHO); United Nations International Children's Emergency Fund (UNICEF) | Yes |
| Multidisciplinary guidance regarding the use of immunomodulatory therapies for acute coronavirus disease 2019 in pediatric patients             | Pediatric Infectious Diseases Society                                                            | No  |
| NACI rapid response: Recommended use of AstraZeneca COVID-19 vaccine in younger adults                                                          | Public Health Agency of Canada (PHAC)                                                            | No  |
| National Psoriasis Foundation COVID-19 Task Force Guidance for Management of Psoriatic Disease During the Pandemic: Version 1                   | American Academy of Dermatology                                                                  | Yes |
| Operating schools during COVID-19: CDC's considerations                                                                                         | Centers for Disease Control and Prevention (CDC)                                                 | Yes |
| Operational considerations for case management of COVID-19 in health facility and community: interim guidance, 19 March 2020                    | World Health Organization (WHO)                                                                  | Yes |
| Operational considerations for influenza surveillance in the WHO European Region during COVID-19: interim guidance. October 2020                | World Health Organization (WHO); European Centre for Disease Prevention and Control (ECDC)       | Yes |
| Operational considerations for managing COVID-19 cases or outbreak in aviation                                                                  | World Health Organization (WHO)                                                                  | Yes |

|                                                                                                                                         |                                                                                                                                                                       |     |
|-----------------------------------------------------------------------------------------------------------------------------------------|-----------------------------------------------------------------------------------------------------------------------------------------------------------------------|-----|
| Operational considerations for managing COVID-19 cases or outbreaks on board ships                                                      | World Health Organization (WHO)                                                                                                                                       | Yes |
| Operational considerations to expedite genomic sequencing component of GISRS surveillance of SARS-CoV-2, 16 February 2021               | World Health Organization (WHO)                                                                                                                                       | Yes |
| Operational guidance: acceptance and uptake of COVID-19 vaccines                                                                        | World Health Organization (WHO)                                                                                                                                       | Yes |
| Operational guidance: COVID-19 immunization service delivery modalities                                                                 | World Health Organization (WHO)                                                                                                                                       | Yes |
| Operational guidance: COVID-19 vaccination data and information management, including monitoring of vaccine effectiveness, January 2021 | World Health Organization (WHO)                                                                                                                                       | No  |
| Operational guidance: evidence-based decisionmaking process for developing national COVID-19 vaccination strategies, January 2021       | World Health Organization (WHO)                                                                                                                                       | Yes |
| Operational guidance: health workforce and security                                                                                     | World Health Organization (WHO)                                                                                                                                       | Yes |
| Operational guidance: legal and regulatory framework facilitating vaccine deployment                                                    | World Health Organization (WHO)                                                                                                                                       | Yes |
| Operational guidance: management structure, advocacy and resources for COVID-19 vaccine deployment and vaccination                      | World Health Organization (WHO)                                                                                                                                       | Yes |
| Operational guide for engaging communities in contact tracing                                                                           | World Health Organization (WHO);International Federation of Red Cross (IFRC);United Nations Children Fund (UNICEF);Global Outbreak Alert and Response Network (GOARN) | Yes |
| Operational Strategy for K-12 Schools through Phased Prevention                                                                         | Centers for Disease Control and Prevention (CDC)                                                                                                                      | Yes |
| Oxygen sources and distribution for COVID-19 treatment centres: interim guidance, 4 April 2020                                          | World Health Organization (WHO)                                                                                                                                       | Yes |
| Pandemic fatigue: reinvigorating the public to prevent COVID-19: policy framework for supporting pandemic prevention and management     | World Health Organization (WHO)                                                                                                                                       | Yes |
| Planning guidance for administration of COVID-19 vaccine                                                                                | Public Health Agency of Canada (PHAC)                                                                                                                                 | Yes |
| Planning guidance for immunization clinics for COVID-19 vaccines                                                                        | Public Health Agency of Canada (PHAC)                                                                                                                                 | Yes |



|                                                                                                                                                                                                                                                                                                  |                                                                     |     |
|--------------------------------------------------------------------------------------------------------------------------------------------------------------------------------------------------------------------------------------------------------------------------------------------------|---------------------------------------------------------------------|-----|
| Practical recommendations for the allergological risk assessment of the COVID-19 vaccination, a harmonized statement of allergy centers in Germany                                                                                                                                               | Allergologie select                                                 | Yes |
| Practice recommendations for the management of children with suspected or proven COVID-19 infections from the Paediatric Mechanical Ventilation Consensus Conference (PEMVECC) and the section Respiratory Failure from the European Society for Paediatric and Neonatal Intensive Care (ESPNIC) | European Society of Paediatric and Neonatal Intensive Care (ESPNIC) | No  |
| Preparedness, prevention and control of coronavirus disease (COVID-19) for refugees and migrants in non-camp settings                                                                                                                                                                            | World Health Organization (WHO)                                     | Yes |
| Preparedness, prevention and control of COVID-19 in prisons and other places of detention: interim guidance, 8 February 2021                                                                                                                                                                     | World Health Organization (WHO)                                     | Yes |
| Prevention, identification and management of health worker infection in the context of COVID-19: interim guidance, 30 October 2020                                                                                                                                                               | World Health Organization (WHO)                                     | Yes |
| Promoting public health measures in response to COVID-19 on cargo ships and fishing vessels: interim guidance, 25 August 2020                                                                                                                                                                    | World Health Organization (WHO)                                     | Yes |
| Promoting the health of migrant workers in the WHO European Region during COVID-19. Interim guidance, 6 November 2020                                                                                                                                                                            | World Health Organization (WHO)                                     | Yes |
| Protecting people with disability during the COVID-19 pandemic                                                                                                                                                                                                                                   | World Health Organization (WHO)                                     | Yes |
| Public health considerations for elections and related activities in the context of the COVID-19 pandemic: interim guidance, 10 December 2020                                                                                                                                                    | World Health Organization (WHO)                                     | Yes |
| Public health surveillance for COVID-19: interim guidance, 16 December 2020                                                                                                                                                                                                                      | World Health Organization (WHO)                                     | Yes |
| Rational use of personal protective equipment for COVID-19 and considerations during severe shortages: interim guidance, 23 December 2020                                                                                                                                                        | World Health Organization (WHO)                                     | Yes |
| Recommendations for Quarantine Duration in Correctional and Detention Facilities                                                                                                                                                                                                                 | Centers for Disease Control and Prevention (CDC)                    | Yes |
| Recommendations on the use of COVID-19 Vaccines                                                                                                                                                                                                                                                  | Public Health Agency of Canada (PHAC)                               | Yes |

|                                                                                                                                                           |                                                                                                                                   |     |
|-----------------------------------------------------------------------------------------------------------------------------------------------------------|-----------------------------------------------------------------------------------------------------------------------------------|-----|
| Recommendations to Member States to improve hand hygiene practices to help prevent the transmission of the COVID-19 virus: interim guidance, 1 April 2020 | World Health Organization (WHO)                                                                                                   | Yes |
| Regional strategy to improve access to medicines and vaccines in the Eastern Mediterranean, 2020, 2030, including lessons from the COVID-19 pandemic      | World Health Organization (WHO)                                                                                                   | Yes |
| Repurposing facilities for isolation and management of mild COVID-19 cases                                                                                | World Health Organization (WHO)                                                                                                   | Yes |
| Responding to community spread of COVID-19                                                                                                                | World Health Organization (WHO)                                                                                                   | Yes |
| Risk assessment and management of exposure of health care workers in the context of COVID-19: interim guidance, 19 March 2020                             | World Health Organization (WHO)                                                                                                   | Yes |
| Risk assessment and management of health-care workers in the context of COVID-19                                                                          | World Health Organization (WHO)                                                                                                   | Yes |
| Risk communication and community engagement for COVID-19 contact tracing: interim guidance                                                                | World Health Organization (WHO)                                                                                                   | No  |
| Roadmap to improve and ensure good indoor ventilation in the context of COVID-19                                                                          | World Health Organization (WHO)                                                                                                   | No  |
| Role of primary care in the COVID-19 response                                                                                                             | World Health Organization (WHO)                                                                                                   | Yes |
| Safe Eid al Adha practices in the context of COVID-19: interim guidance, 25 July 2020                                                                     | World Health Organization (WHO)                                                                                                   | Yes |
| Safe Ramadan practices in the context of the COVID-19                                                                                                     | World Health Organization (WHO)                                                                                                   | Yes |
| SARS-CoV-2 - increased circulation of variants of concern and vaccine rollout in the EU/EEA, 14th update                                                  | European Centre for Disease Prevention and Control (ECDC)                                                                         | Yes |
| SARS-CoV-2 antigen-detecting rapid diagnostic tests: an implementation guide                                                                              | World Health Organization (WHO)                                                                                                   | Yes |
| SARS-CoV-2 genomic sequencing for public health goals                                                                                                     | World Health Organization (WHO)                                                                                                   | Yes |
| SARS-CoV-2 in animals used for fur farming: GLEWS+ risk assessment, 20 January 2021                                                                       | World Health Organization (WHO)                                                                                                   | Yes |
| Schooling during COVID-19: recommendations from the European Technical Advisory Group for schooling during COVID-19, June 2021                            | World Health Organization (WHO)                                                                                                   | Yes |
| Schools and the Path to Zero: Strategies for Pandemic Resilience in the Face of High Community Spread                                                     | Multi-disciplinary group of experts at Harvard University, Brown University, Boston University, Tufts University, and New America | Yes |
| Schools Pathway for Covid-19, the Public Health approach                                                                                                  | Health Protection Surveillance Centre                                                                                             | Yes |

|                                                                                                                                                                                                                                                                                                                    |                                                           |     |
|--------------------------------------------------------------------------------------------------------------------------------------------------------------------------------------------------------------------------------------------------------------------------------------------------------------------|-----------------------------------------------------------|-----|
| Screening K-12 students for symptoms of COVID-19: limitations and considerations.                                                                                                                                                                                                                                  | Centers for Disease Control and Prevention (CDC)          | Yes |
| Selecting digital contact tracing and quarantine tools for COVID-19                                                                                                                                                                                                                                                | World Health Organization (WHO)                           | Yes |
| Sequencing of SARS-CoV-2: first update                                                                                                                                                                                                                                                                             | European Centre for Disease Prevention and Control (ECDC) | Yes |
| Spanish consensus document on diagnosis, stabilisation and treatment of pediatric multisystem inflammatory syndrome related to SARS-CoV-2 (SIM-PedS)                                                                                                                                                               | Asociación Española de Pediatría                          | Yes |
| Strategic considerations in preparing for deployment of COVID-19 vaccine and vaccination in the WHO European Region, 9 October 2020                                                                                                                                                                                | World Health Organization (WHO)                           | Yes |
| Strategies for Protecting K-12 School Staff from COVID-19                                                                                                                                                                                                                                                          | Centers for Disease Control and Prevention (CDC)          | Yes |
| Strengthening preparedness for COVID-19 in cities and urban settings: interim guidance for local authorities                                                                                                                                                                                                       | World Health Organization (WHO)                           | Yes |
| Strengthening the health system response to COVID-19 in the WHO transmission scenarios: action points: action points for the WHO European Region (1 April 2020)                                                                                                                                                    | World Health Organization (WHO)                           | Yes |
| Strengthening the health systems response to COVID-19: technical guidance #6: preventing and managing the COVID-19                                                                                                                                                                                                 | World Health Organization (WHO)                           | Yes |
| Summary of the 31st meeting of the International Task Force for Disease Eradication, 20–21 October 2020                                                                                                                                                                                                            | World Health Organization (WHO)                           | Yes |
| Summary report on a WHO online consultation in response to the COVID-19 pandemic planning for rapid dissemination and implementation of the WHO consolidated guideline on self-care interventions to strengthen sexual and reproductive health in the Eastern Mediterranean Region, virtual meeting, 30 April 2020 | World Health Organization (WHO)                           | Yes |
| Summary report on the virtual meeting of the regional Green Light Committee for the Eastern Mediterranean, 18 June 2020                                                                                                                                                                                            | World Health Organization (WHO)                           | Yes |
| Surveillance case definitions for human infection with novel coronavirus (nCoV), interim guidance, 15 January 2020                                                                                                                                                                                                 | World Health Organization (WHO)                           | Yes |

|                                                                                                                                                    |                                                                                                  |     |
|----------------------------------------------------------------------------------------------------------------------------------------------------|--------------------------------------------------------------------------------------------------|-----|
| Technical specifications for invasive and non-invasive ventilators for COVID-19                                                                    | World Health Organization (WHO)                                                                  | Yes |
| Technical specifications for pressure swing adsorption (PSA) oxygen plants                                                                         | World Health Organization (WHO)                                                                  | Yes |
| Technical specifications of personal protective equipment for COVID-19: interim guidance, 13 November 2020                                         | World Health Organization (WHO)                                                                  | Yes |
| Testing, Screening, and Outbreak Response for Institutions of Higher Education (IHEs)                                                              | Centers for Disease Control and Prevention (CDC)                                                 | Yes |
| The Advisory Committee on Immunization Practices, interim recommendation for use of Janssen COVID-19 vaccine, United States, February 2021         | Centers for Disease Control and Prevention (CDC)                                                 | No  |
| The Advisory Committee on Immunization Practices, Interim Recommendation for Use of Moderna COVID-19 Vaccine                                       | Centers for Disease Control and Prevention (CDC)                                                 | No  |
| The Advisory Committee on Immunization Practices, Interim Recommendation for Use of Pfizer-BioNTech COVID-19 Vaccine, United States, December 2020 | Centers for Disease Control and Prevention (CDC)                                                 | No  |
| The Advisory Committee on Immunization Practices, Updated Interim Recommendation for Allocation of COVID-19 Vaccine, United States, December 2020  | Centers for Disease Control and Prevention (CDC)                                                 | Yes |
| The heart and COVID-19: what cardiologists need to know                                                                                            | Arq Bras Cardiol                                                                                 | No  |
| Therapeutics and COVID-19: living guideline, 6th July 2021                                                                                         | World Health Organization (WHO)                                                                  | No  |
| Transmission of SARS-CoV-2: implications for infection prevention precautions                                                                      | World Health Organization (WHO)                                                                  | Yes |
| Use of Anticoagulation in Patients with COVID-19                                                                                                   | American Society of Hematology (ASH)                                                             | No  |
| Use of Chest Imaging in the Diagnosis and Management of COVID-19                                                                                   | World Health Organization (WHO)                                                                  | No  |
| Vaccinating Pregnant and Lactating Patients Against COVID-19                                                                                       | American College of Obstetricians and Gynaecologists (ACOG)                                      | Yes |
| Vaccine-Induced Prothrombotic Immune Thrombocytopenia (VIPIT) Following AstraZeneca COVID-19 Vaccination                                           | Ontario COVID-19 Science Advisory Table                                                          | Yes |
| Water, sanitation, hygiene, and waste management for SARS-CoV-2, the virus that causes COVID-19: interim guidance, 29 July 2020                    | World Health Organization (WHO); United Nations International Children's Emergency Fund (UNICEF) | Yes |

|                                                                                                                                                                       |                                 |     |
|-----------------------------------------------------------------------------------------------------------------------------------------------------------------------|---------------------------------|-----|
| Western Pacific Regional guide for the immunization programme and vaccine-preventable disease surveillance during the COVID-19 pandemic                               | World Health Organization (WHO) | Yes |
| What are relevant, feasible and effective approaches to promote acceptance, uptake and adherence to physical distancing measures for COVID-19 prevention and control? | World Health Organization (WHO) | Yes |
| WHO high-level mission to North Macedonia on coronavirus disease 2019 (,“COVID-19),“ 23,“25 June 2020                                                                 | World Health Organization (WHO) | No  |
| WHO information note: COVID-19: considerations for tuberculosis (TB) care, 5 May 2021                                                                                 | World Health Organization (WHO) | Yes |
| WHO interim guidance note: health workforce response to the COVID-19 pandemic: April 2020                                                                             | World Health Organization (WHO) | No  |
| WHO living guideline: drugs to prevent COVID-19: interim guidance, 2 March 2021                                                                                       | World Health Organization (WHO) | No  |
| WHO R&D Blueprint: novel Coronavirus: outline of designs for experimental therapeutics                                                                                | World Health Organization (WHO) | No  |
| WHO R&D Blueprint: novel Coronavirus: outline of trial designs for experimental therapeutics, January 27, 2020, Geneva, Switzerland                                   | World Health Organization (WHO) | Yes |
| WHO R&D Blueprint: novel Coronavirus: prospects for evaluating cross-reactivity of nCoV with SARS-CoV: January 24, 2020, Geneva, Switzerland                          | World Health Organization (WHO) | No  |
| WHO recommendations to reduce risk of transmission of emerging pathogens from animals to humans in live animal markets or animal product markets, 26 March 2020       | World Health Organization (WHO) | Yes |
| WHO Regional Office for Europe recommendations on influenza vaccination for the 2020/2021 season during the ongoing COVID-19 pandemic                                 | World Health Organization (WHO) | Yes |
| Why people living and working in detention facilities should be included in national COVID-19 vaccination plans: advocacy brief                                       | World Health Organization (WHO) | Yes |

**Supplementary Table S3. Examples at the judgement level for the Good Practice Statement evaluation criteria. "Created by authors"**

| Good Practice Statement Criterion                                    | Judgment     | Example                                                                                                                                                                                                                                                                                                                                                                                                                                                                                                                                                                                                |
|----------------------------------------------------------------------|--------------|--------------------------------------------------------------------------------------------------------------------------------------------------------------------------------------------------------------------------------------------------------------------------------------------------------------------------------------------------------------------------------------------------------------------------------------------------------------------------------------------------------------------------------------------------------------------------------------------------------|
| (1) Statement is clear and actionable                                | Yes          | <p>"The World Health Organization (WHO) recommends COVID-19 vaccination services select personal protective equipment (PPE) based on risk assessment as part of standard precautions." From <i>Infection prevention and control (IPC) principles and procedures for COVID-19 vaccination activities</i></p> <p>Justification: This is a clear actionable statement directed to hospital managers, immunization programme managers, Infection Prevention Control (IPC) focal points as well as for health workers involved in COVID-19 vaccination delivery.</p>                                        |
|                                                                      | Probably Yes | <p>"It is important to maintain an optimal humidity level, between 30% and 50% in indoor settings." From <i>COVID-19: Guidance on indoor ventilation during the pandemic</i></p> <p>Justification: Statement refers to setting (indoor) but does not use actionable term, rather uses informative language.</p>                                                                                                                                                                                                                                                                                        |
|                                                                      | Probably No  | <p>"In immunization clinic settings, pre-loading of syringes supports timely and efficient vaccine administration." From <i>Planning guidance for immunization clinics for COVID-19 vaccines</i></p> <p>Justification: The statement uses informative language but specifies setting (Immunization clinic) for applying the statement.</p>                                                                                                                                                                                                                                                             |
|                                                                      | No           | <p>"According to Public Health Agency of Canada, securing additional staff in immunization clinics will be necessary." From <i>Planning guidance for immunization clinics for COVID-19 vaccines</i></p> <p>Justification: Statement is suggestive rather than actionable.</p>                                                                                                                                                                                                                                                                                                                          |
| (2) Message really necessary in regard to actual healthcare practice | Yes          | <p>"Increased health surveillance should be considered for mink and mink farm workers and any other people in close contact with mink, especially at farms with a previous/current history of personnel with COVID-19." From <i>Detection of new SARS-CoV-2 variants related to mink</i></p> <p>Justification: "Intensively reared animal species, susceptible to SARS-CoV-2, such as mink may act as an amplifier of the virus, leading to an increased virus biomass in the environment, and a greater risk of virus mutations and transmission within farmed mink and between mink and humans."</p> |

|                                                                                   |              |                                                                                                                                                                                                                                                                                                                                                                                                                                                                                                                                                                                                                                                                                                                                            |
|-----------------------------------------------------------------------------------|--------------|--------------------------------------------------------------------------------------------------------------------------------------------------------------------------------------------------------------------------------------------------------------------------------------------------------------------------------------------------------------------------------------------------------------------------------------------------------------------------------------------------------------------------------------------------------------------------------------------------------------------------------------------------------------------------------------------------------------------------------------------|
|                                                                                   | Probably Yes | <p>“The Public Health Agency of Canada recommends schools increase ventilation by considering the following, for all ages: move activities outdoors when possible (for example, lunch, classes, physical activity) and consider moving classrooms outside when space and weather permit; Ensure that the ventilation system operates properly increase air exchanges by adjusting the HVAC system; Open windows when possible and if weather permits.” From <i>COVID-19 guidance for schools Kindergarten to Grade 12</i></p> <p>Justification: Increasing ventilation may help to reduce transmission and can limit spread of infection in schools and the community. Consequently, this can lessen the burden on healthcare systems.</p> |
|                                                                                   | Probably No  | <p>“Perform hand hygiene after each recipient using soap and water or with hand sanitizer containing 60-80% alcohol.” From <i>Framework for decision-making: implementation of mass vaccination campaigns in the context of COVID-19</i></p> <p>Justification: This act may usually be conducted in regular practice.</p>                                                                                                                                                                                                                                                                                                                                                                                                                  |
|                                                                                   | No           | -                                                                                                                                                                                                                                                                                                                                                                                                                                                                                                                                                                                                                                                                                                                                          |
| (3) Implementing the statement likely results in a large net positive consequence | Yes          | <p>“The national infection prevention and control (IPC) programme and COVID-19 response should consider supporting and strengthening IPC in long-term care facilities (LTCFs) to be a high priority.” From <i>Infection prevention and control guidance for long-term care facilities in the context of COVID-19: interim guidance</i></p> <p>Justification: Implementing the statement “can significantly reduce the risk of SARS-CoV-2 transmission among residents, staff and caregivers in long-term care facilities (LTCFs).”</p>                                                                                                                                                                                                     |
|                                                                                   | Probably Yes | <p>“Adapt school opening policies and practices to expand access to marginalized groups such as previously out-of-school children, displaced/migrant children and minorities.” From <i>Framework for reopening schools</i></p> <p>Justification: Implementation will likely increase equitable access to education and strengthen the protection, health and safety of children.</p>                                                                                                                                                                                                                                                                                                                                                       |
|                                                                                   | Probably No  | <p>“The use of portable air filtration devices with high-efficiency particulate air (HEPA) filter devices could be considered as an additional protection in situations where enhancing natural or mechanical ventilation is not possible and when physical distancing cannot be achieved.” From <i>COVID-19: Guidance on indoor ventilation during the pandemic</i></p>                                                                                                                                                                                                                                                                                                                                                                   |

|                                                                                                                     |              |                                                                                                                                                                                                                                                                                                                                                                                                                                                                                                                                                                                                                        |
|---------------------------------------------------------------------------------------------------------------------|--------------|------------------------------------------------------------------------------------------------------------------------------------------------------------------------------------------------------------------------------------------------------------------------------------------------------------------------------------------------------------------------------------------------------------------------------------------------------------------------------------------------------------------------------------------------------------------------------------------------------------------------|
|                                                                                                                     |              | Justification: Without public adherence to other public health measures (like limiting number of individuals indoors, physical distancing, wearing masks), using HEPA filters may not have a large net positive effect.                                                                                                                                                                                                                                                                                                                                                                                                |
|                                                                                                                     | No           | -                                                                                                                                                                                                                                                                                                                                                                                                                                                                                                                                                                                                                      |
| (4) Collecting and summarizing the evidence is a poor use of a guideline panel's limited time, energy, or resources | Yes          | <p>According to the Public Health Agency of Canada (PHAC), the influenza vaccine should continue to be offered to anyone 6 months of age and older who does not have contraindications to the vaccine. <i>From Guidance on the use of influenza vaccine in the presence of COVID-19</i></p> <p>Justification: "The influenza vaccine has a long-standing safety record and is a critical tool to protect against influenza-related disease and to reduce the influenza-associated burden on the Canadian health care system, which is even more important for this influenza season, in the context of COVID-19. "</p> |
|                                                                                                                     | Probably Yes | <p>"To prevent transmission of COVID-19 at immunization clinics, it will be essential to minimize crowding and ensure physical distancing." <i>From Planning guidance for immunization clinics for COVID-19 vaccines</i></p> <p>Justification: Minimizing crowding at vaccine clinics prevents the transmission of SARS-CoV-2 and can encourage the public to come in and get vaccinated.</p>                                                                                                                                                                                                                          |
|                                                                                                                     | Probably No  | <p>"Wherever possible, high-risk exposure contacts should be actively followed-up by public health authorities, whereas low-risk exposure contacts should self-monitor for symptoms while observing physical distancing measures and avoiding travel." <i>From Contact tracing: public health management of persons, including healthcare workers, who have had contact with COVID-19 cases in the European Union third update</i></p> <p>Justification: Evidence on how to classify risk exposure and how to conduct efficient contact tracing is evolving and recommendations may require continuous updating.</p>   |
| (5) Rationale connecting indirect evidence                                                                          | Yes          | <p>"Vaccination should be rapidly accelerated to target priority groups." <i>From SARS-CoV-2 - increased circulation of variants of concern and vaccine rollout in the EU/EEA, 14th update</i></p> <p>Justification: "Vaccines are a key part of a long-term strategy to bring SARS-CoV-2 under control. The emergence of more transmissible variants may cause increased hospital admissions and deaths in the coming weeks, despite ongoing vaccine deployment. Some emerging</p>                                                                                                                                    |



|  |              |                                                                                                                                                                                                                                                                                                                                                                                                                                                                                                                                                                                        |
|--|--------------|----------------------------------------------------------------------------------------------------------------------------------------------------------------------------------------------------------------------------------------------------------------------------------------------------------------------------------------------------------------------------------------------------------------------------------------------------------------------------------------------------------------------------------------------------------------------------------------|
|  |              | variants may also partially escape the immunity induced by the currently available vaccines."                                                                                                                                                                                                                                                                                                                                                                                                                                                                                          |
|  | Probably Yes | <p>The Centers for Disease Control and Prevention recommends that healthcare facilities should ensure consistent recommended infection control practices for hospitalized pregnant patients who have suspected or confirmed COVID-19. <i>From Considerations for Inpatient Obstetric Healthcare Settings</i></p> <p>Justification: When preparing for and responding to patients with suspected or confirmed SARS-CoV-2 infection, consistent recommended infection control practices are important to prevent secondary spread of infection in healthcare facilities.</p>             |
|  | Probably No  | <p>Countries are strongly urged to execute only high-quality preventive vaccination campaigns that can be conducted under safe conditions, without undue harm to health workers and the community when considering lifting any temporary suspensions on preventive mass vaccination campaigns. <i>From Framework for decision-making: implementation of mass vaccination campaigns in the context of COVID-19</i></p> <p>Justification: There is no description in the guideline what high-quality means. Therefore, the link between the bodies of indirect evidence are unclear.</p> |
